# Supplementary material for: Structure of the decoy module of human glycoprotein 2 and uromodulin and its interaction with bacterial adhesin FimH
Source: PubMed Central journal article supplement (PMC8930769; doi:10.1038/s41594-022-00729-3), 2022-03-10
Supplement: 41594_2022_729_MOESM1_ESM.pdf [file 41594_2022_729_MOESM1_ESM.pdf]

---

**Supplementary information**

---

**Structure of the decoy module of human glycoprotein 2 and uromodulin and its interaction with bacterial adhesin FimH**

---

In the format provided by the authors and unedited

**Supplementary Table 1**  
**X-ray data collection, refinement and validation statistics**

|                                    | <b>GP2 decoy module<br/>crystal form I (P1)</b><br>(PDB 7P6R) | <b>GP2 decoy module<br/>crystal form II (P2<sub>1</sub>2<sub>1</sub>2<sub>1</sub>)</b><br>(PDB 7P6S) | <b>GP2 decoy module<br/>crystal form III (C2)</b><br>(PDB 7P6T) |
|------------------------------------|---------------------------------------------------------------|------------------------------------------------------------------------------------------------------|-----------------------------------------------------------------|
| <b>Data collection</b>             |                                                               |                                                                                                      |                                                                 |
| Space group                        | <i>P</i> 1 [1]                                                | <i>P</i> 2 <sub>1</sub> 2 <sub>1</sub> 2 <sub>1</sub> [19]                                           | <i>C</i> 2 [5]                                                  |
| Cell dimensions                    |                                                               |                                                                                                      |                                                                 |
| <i>a</i> , <i>b</i> , <i>c</i> (Å) | 33.04, 46.53, 57.44                                           | 33.48, 59.50, 87.04                                                                                  | 90.15, 33.66, 59.63                                             |
| $\alpha$ , $\beta$ , $\gamma$ (°)  | 68.750, 75.873, 72.398                                        | 90, 90, 90                                                                                           | 90, 111.839, 90                                                 |
| Resolution (Å)                     | 52.9–1.90 (1.97–1.90)*                                        | 49.1–1.35 (1.39–1.35)                                                                                | 29.0–1.40 (1.47–1.40)                                           |
| No. unique reflections             | 22914 (2161)                                                  | 38991 (2960)                                                                                         | 32721 (4653)                                                    |
| Completeness (%)                   | 96.6 (91.4)                                                   | 99.7 (98.2)                                                                                          | 98.4 (96.8)                                                     |
| Redundancy                         | 3.5 (3.2)                                                     | 6.0 (4.7)                                                                                            | 6.9 (6.7)                                                       |
| <i>R</i> <sub>merge</sub>          | 0.099 (0.509)                                                 | 0.153 (2.318)                                                                                        | 0.104 (3.379)                                                   |
| <i>R</i> <sub>meas</sub>           | 0.118 (0.611)                                                 | 0.167 (2.612)                                                                                        | 0.112 (3.663)                                                   |
| <i>R</i> <sub>pim</sub>            | 0.063 (0.333)                                                 | 0.067 (1.180)                                                                                        | 0.042 (1.396)                                                   |
| Wilson B-factor (Å <sup>2</sup> )  | 20.1                                                          | 13.2                                                                                                 | 18.9                                                            |
| <i>I</i> / $\sigma$ <i>I</i>       | 8.8 (2.6)                                                     | 7.0 (0.7)                                                                                            | 8.6 (0.6)                                                       |
| CC <sub>1/2</sub>                  | 0.99 (0.89)                                                   | 1.00 (0.40)                                                                                          | 1.00 (0.48)                                                     |
| CC*                                | 1.00 (0.97)                                                   | 1.00 (0.75)                                                                                          | 1.00 (0.81)                                                     |
| <b>Refinement</b>                  |                                                               |                                                                                                      |                                                                 |
| Resolution (Å)                     | 52.9–1.90 (1.97–1.90)                                         | 49.1–1.35 (1.39–1.35)                                                                                | 29.0–1.40 (1.47–1.40)                                           |
| No. reflections                    | 22860 (2157)                                                  | 38932 (2921)                                                                                         | 32522 (4534)                                                    |
| No. free reflections               | 1579 (152)                                                    | 2027 (153)                                                                                           | 2018 (280)                                                      |
| <i>R</i> <sub>work</sub>           | 0.233 (0.275)                                                 | 0.194 (0.422)                                                                                        | 0.194 (0.514)                                                   |
| <i>R</i> <sub>free</sub>           | 0.280 (0.313)                                                 | 0.224 (0.429)                                                                                        | 0.223 (0.518)                                                   |
| No. non-H atoms                    | 2400                                                          | 1389                                                                                                 | 1288                                                            |
| Protein                            | 2061                                                          | 1122                                                                                                 | 1067                                                            |
| Ligand/ion                         | 106                                                           | 35                                                                                                   | 87                                                              |
| Water                              | 233                                                           | 232                                                                                                  | 134                                                             |
| No. protein residues               | 265                                                           | 142                                                                                                  | 138                                                             |
| <i>B</i> -factors                  | 28.7                                                          | 18.5                                                                                                 | 31.3                                                            |
| Protein                            | 27.9                                                          | 16.5                                                                                                 | 28.6                                                            |
| Ligand/ion                         | 38.7                                                          | 18.2                                                                                                 | 53.4                                                            |
| Water                              | 31.2                                                          | 28.2                                                                                                 | 38.4                                                            |
| R.m.s. deviations                  |                                                               |                                                                                                      |                                                                 |
| Bond lengths (Å)                   | 0.007                                                         | 0.004                                                                                                | 0.003                                                           |
| Bond angles (°)                    | 0.73                                                          | 0.72                                                                                                 | 0.67                                                            |
| Validation                         |                                                               |                                                                                                      |                                                                 |
| MolProbity score                   | 1.23                                                          | 0.95                                                                                                 | 0.66                                                            |
| Clashscore                         | 4.59                                                          | 1.83                                                                                                 | 0.45                                                            |
| Rotamer outliers (%)               | 0.0                                                           | 0.0                                                                                                  | 0.0                                                             |
| Ramachandran plot                  |                                                               |                                                                                                      |                                                                 |
| Overall Z-score                    | -1.29 ± 0.44                                                  | -1.47 ± 0.55                                                                                         | -1.12 ± 0.60                                                    |
| Favored (%)                        | 98.4                                                          | 98.6                                                                                                 | 98.5                                                            |
| Allowed (%)                        | 1.6                                                           | 1.4                                                                                                  | 1.5                                                             |
| Disallowed (%)                     | 0.0                                                           | 0.0                                                                                                  | 0.0                                                             |

\* Values in parentheses are for highest-resolution shell

## Supplementary Table 2

### Pathogenic UMOD D10C domain missense mutations

| UMOD mutation                    | Equivalent GP2 residue* | Predicted mutation effect based on structural information                                                                                                                                   | Disease reported <sup>§</sup> | Reference           |
|----------------------------------|-------------------------|---------------------------------------------------------------------------------------------------------------------------------------------------------------------------------------------|-------------------------------|---------------------|
| D172H                            | <b>D61</b>              | Affects the relative orientation of the $\beta$ -hairpin and D10C domain by disrupting the salt bridge between D172 and K265 (K155 in GP2)                                                  | TN                            | 66                  |
| P173L<br>P173R                   | <b>P62</b>              | The mutated residue clashes against invariant W202 (W92 in GP2), affecting the interface between the D10C domain and the $\beta$ -hairpin                                                   | UAKD<br>FJHN                  | 4<br>67             |
| C174R                            | <b>C63</b>              | Destroys conserved disulfide bond C <sub>1</sub> -C <sub>8</sub>                                                                                                                            | UAKD                          | 68                  |
| R185C                            | <b>R74</b>              | Disrupts the interaction between helix 3 <sub>10</sub> B and loop 3 <sub>10</sub> B- $\beta$ B                                                                                              | TN                            | 66                  |
| R185G                            |                         |                                                                                                                                                                                             | FJHN                          | 69                  |
| R185H                            |                         |                                                                                                                                                                                             | TN                            | 66                  |
| R185L                            |                         |                                                                                                                                                                                             | ADTKD                         | 70                  |
| R185S                            |                         |                                                                                                                                                                                             | FJHN                          | 71                  |
| C195F<br>C195Y                   | <b>C85</b>              | Destroys conserved disulfide bond C <sub>2</sub> -C <sub>9</sub>                                                                                                                            | FJHN<br>FJHN                  | 72<br>73            |
| D196N<br>D196Y                   | <b>D86</b>              | Disrupts the interaction between loop 3 <sub>10</sub> B- $\beta$ B and helix 3 <sub>10</sub> B                                                                                              | FJHN<br>FJHN                  | 69<br>74            |
| W202C<br>W202S                   | <b>W92</b>              | Disrupts the interaction between the D10C domain and the $\beta$ -hairpin                                                                                                                   | UAKD<br>FJHN                  | 4<br>72             |
| R204G<br>R204P                   | <b>R94</b>              | Disrupts the cation- $\pi$ interaction with $\beta$ G Y271 (Y161 in GP2) and affects the interface between the 3 <sub>10</sub> A- $\beta$ A region and the D10C domain $\beta$ -strand core | FJHN<br>TN                    | 71<br>66            |
| G210D<br>G210S                   | G100                    | The mutated residue clashes against the C-terminal end of D10C that includes $\beta$ -strand I                                                                                              | UAKD<br>TN                    | 4<br>66             |
| R212C                            | R102                    | Interferes with correct disulfide bond formation                                                                                                                                            | UAKD                          | 75                  |
| C217G<br>C217R<br>C217W          | C <sub>3</sub> 107      | Destroys conserved disulfide bond C <sub>3</sub> -C <sub>6</sub>                                                                                                                            | FJHN, TN<br>FJHN<br>FJHN      | 66,71<br>76<br>69   |
| C223R<br>C223Y                   | <b>C113</b>             | Destroys conserved disulfide bond C <sub>4</sub> -C <sub>10</sub>                                                                                                                           | FJHN<br>FJHN                  | 69<br>77            |
| T225K<br>T225M                   | T115                    | Disrupts hydrogen bonding between the Thr hydroxyl group and main chain atoms; introduces clashes with $\beta$ -strands D/H                                                                 | MCKD2<br>FJHN                 | 78<br>71            |
| M229R                            | M119                    | Disrupts D10C hydrophobic core                                                                                                                                                              | FJHN/MCKD                     | 79                  |
| W230R                            | W120                    | Disrupts a key D10C residue whose aromatic side chain lies between the C <sub>3</sub> -C <sub>6</sub> and C <sub>5</sub> -C <sub>7</sub> disulfides                                         | UAKD                          | 80                  |
| P236L<br>P236Q<br>P236R<br>P236S | P126                    | Disrupts the interaction between loop $\beta$ D- $\beta$ E and the D10C domain $\beta$ -strand core                                                                                         | FJHN<br>FJHN<br>FJHN<br>UAKD  | 72<br>81<br>82<br>4 |
| C248S<br>C248W                   | C <sub>5</sub> 138      | Destroys conserved disulfide bond C <sub>5</sub> -C <sub>7</sub>                                                                                                                            | UAKD<br>MCKD2                 | 80<br>78            |
| H250L<br>H250Q                   | H140                    | Disrupts the packing of the His ring against the C <sub>3</sub> -C <sub>6</sub> disulfide (on the opposite side of W230 (GP2 W120))                                                         | TN<br>TN                      | 66<br>83            |
| C255Y                            | C <sub>6</sub> 145      | Destroys conserved disulfide bond C <sub>3</sub> -C <sub>6</sub>                                                                                                                            | FJHN                          | 84                  |
| C256G<br>C256Y                   | C <sub>7</sub> 146      | Destroys conserved disulfide bond C <sub>5</sub> -C <sub>7</sub>                                                                                                                            | FJHN<br>UAKD                  | 85<br>75            |
| C267F                            | <b>C8157</b>            | Destroys conserved disulfide bond C <sub>1</sub> -C <sub>8</sub>                                                                                                                            | MCKD2, FJHN                   | 86                  |
| G269C                            | G159                    | Interferes with correct disulfide bond formation and the $\beta$ -turn between strands $\beta$ F and $\beta$ G                                                                              | UAKD                          | 4                   |
| G270C                            | G160                    | Interferes with correct disulfide bond formation and the $\beta$ -turn between strands $\beta$ F and $\beta$ G                                                                              | UAKD                          | 87                  |
| V273F<br>V273L                   | <b>V163</b>             | Introduces clashes into the hydrophobic core                                                                                                                                                | FJHN/MCKD<br>TN               | 79<br>66            |
| Y274C<br>Y274H                   | <b>Y164</b>             | Destabilizes the structure of the $\beta$ G strand, carrying the UMOD high-mannose glycan and, in the case of Y274C, may also interfere with correct disulfide bond formation               | UAKD                          | 80                  |
| C282R<br>C282S                   | C <sub>9</sub> 172      | Destroys conserved disulfide bond C <sub>2</sub> -C <sub>9</sub>                                                                                                                            | FJHN<br>UAKD                  | 71<br>4             |
| L284P                            | L174                    | Affects closely located disulfide bond C <sub>2</sub> -C <sub>9</sub>                                                                                                                       | UAKD                          | 4                   |
| C287F                            | <b>C10177</b>           | Destroys conserved disulfide bond C <sub>4</sub> -C <sub>10</sub>                                                                                                                           | ADTKD                         | 88                  |

\* Residues shown in Fig. 1c-g and Extended Data Fig. 5c-g are highlighted in bold

<sup>§</sup> ADTKD, Autosomal Dominant Tubulointerstitial Kidney Disease; FJHN, Familial Juvenile Hyperuricemic Nephropathy; MCKD, Medullary Cystic Kidney Disease; TN, Tubulointerstitial Nephritis; UAKD, Uromodulin-Associated Kidney Disease

**Supplementary Table 3**  
**Cryo-EM data collection, refinement and validation statistics**

|                                                     | Full-length UMOD<br>(EMD-10553 + EMD-13378)<br>(PDB 7PFP) | UMOD branch + EGF IV/<br>FimH <sub>L</sub> complex<br>(EMD-13794)<br>(PDB 7Q3N) |                                                                                 |
|-----------------------------------------------------|-----------------------------------------------------------|---------------------------------------------------------------------------------|---------------------------------------------------------------------------------|
| <b>Data collection and processing</b>               |                                                           |                                                                                 |                                                                                 |
| Magnification                                       | 130,000x                                                  | 105,000x                                                                        |                                                                                 |
| Voltage (kV)                                        | 300                                                       | 300                                                                             |                                                                                 |
| Electron exposure (e <sup>-</sup> /Å <sup>2</sup> ) | 39.6                                                      | 40                                                                              |                                                                                 |
| Defocus range (µm)                                  | -1.5 to -3.5                                              | -1 to -3                                                                        |                                                                                 |
| Pixel size (Å)                                      | 1.06                                                      | 0.84                                                                            |                                                                                 |
| Body                                                | Filament core +<br>D10C domain                            | Branch                                                                          |                                                                                 |
| Symmetry imposed                                    | Helical (with<br>62.5 Å rise,<br>180.0° twist)            | Non-<br>helical                                                                 | Helical (initial; with<br>65.2 Å rise,<br>180.0° twist);<br>non-helical (final) |
| Initial particle images (no.)                       | 412,322                                                   | 412,322                                                                         | 3,767,790                                                                       |
| Final particle images (no.)                         | 288,403                                                   | 114,206                                                                         | 225,819                                                                         |
| Map resolution (Å)                                  | 3.35                                                      | 6.1                                                                             | 7.4                                                                             |
| FSC threshold                                       | 0.143                                                     | 0.143                                                                           | 0.143                                                                           |
| Map resolution range (Å)                            | 3.0–4.2                                                   | 5.0–6.8                                                                         | 6.4–7.9                                                                         |
| <b>Refinement</b>                                   |                                                           |                                                                                 |                                                                                 |
| Initial models used (PDB codes)                     | PDB 6TQK,<br>AlphaFold2 model,<br>PDB 7P6R/7P6S/7P6T      | PDB 7PFP,<br>PDB 6GTW                                                           |                                                                                 |
| Model resolution (Å)                                |                                                           |                                                                                 |                                                                                 |
| masked                                              | 4.1                                                       | 8.3                                                                             |                                                                                 |
| unmasked                                            | 4.4                                                       | 8.5                                                                             |                                                                                 |
| FSC threshold                                       | 0.143                                                     | 0.143                                                                           |                                                                                 |
| Map sharpening <i>B</i> factor (Å <sup>2</sup> )    | -200                                                      | -150                                                                            |                                                                                 |
| Model composition                                   |                                                           |                                                                                 |                                                                                 |
| Non-hydrogen atoms                                  | 9,582                                                     | 3,599                                                                           |                                                                                 |
| Protein residues                                    | 1,127                                                     | 451                                                                             |                                                                                 |
| Carbohydrate residues                               | 84                                                        | 20                                                                              |                                                                                 |
| <i>B</i> factors (Å <sup>2</sup> )                  |                                                           |                                                                                 |                                                                                 |
| Protein                                             | 315                                                       | 404                                                                             |                                                                                 |
| Carbohydrate residues                               | 406                                                       | 291                                                                             |                                                                                 |
| R.m.s. deviations                                   |                                                           |                                                                                 |                                                                                 |
| Bond lengths (Å)                                    | 0.005                                                     | 0.003                                                                           |                                                                                 |
| Bond angles (°)                                     | 0.845                                                     | 0.672                                                                           |                                                                                 |
| Validation                                          |                                                           |                                                                                 |                                                                                 |
| MolProbity score                                    | 1.83                                                      | 1.71                                                                            |                                                                                 |
| Clashscore                                          | 4.08                                                      | 9.47                                                                            |                                                                                 |
| Poor rotamers (%)                                   | 2.4                                                       | 0.5                                                                             |                                                                                 |
| Ramachandran plot                                   |                                                           |                                                                                 |                                                                                 |
| Overall Z-score                                     | -1.66 ± 0.24                                              | -0.74 ± 0.37                                                                    |                                                                                 |
| Favored (%)                                         | 94.9                                                      | 96.6                                                                            |                                                                                 |
| Allowed (%)                                         | 5.1                                                       | 3.4                                                                             |                                                                                 |
| Disallowed (%)                                      | 0.0                                                       | 0.0                                                                             |                                                                                 |

## Supplementary References

66. Bollée, G. *et al.* Phenotype and outcome in hereditary tubulointerstitial nephritis secondary to *UMOD* mutations. *Clin. J. Am. Soc. Nephrol.* **6**, 2429–2438 (2011).
67. Iguchi, A. *et al.* A novel mutation in the uromodulin gene in a Japanese family with a mild phenotype of familial juvenile hyperuricemic nephropathy. *CEN Case Rep.* **2**, 228–233 (2013).
68. Moskowitz, J. L. *et al.* Association between genotype and phenotype in uromodulin-associated kidney disease. *Clin. J. Am. Soc. Nephrol.* **8**, 1349–1357 (2013).
69. Williams, S. E. *et al.* Uromodulin mutations causing familial juvenile hyperuricaemic nephropathy lead to protein maturation defects and retention in the endoplasmic reticulum. *Hum. Mol. Genet.* **18**, 2963–2974 (2009).
70. Zhang, L.-L. *et al.* Autosomal dominant tubulointerstitial kidney disease with a novel heterozygous missense mutation in the uromodulin gene: A case report. *World J. Clin. Cases* **9**, 10249–10256 (2021).
71. Dahan, K. *et al.* A cluster of mutations in the *UMOD* gene causes familial juvenile hyperuricemic nephropathy with abnormal expression of uromodulin. *J. Am. Soc. Nephrol.* **14**, 2883–2893 (2003).
72. Kudo, E. *et al.* Familial juvenile hyperuricemic nephropathy: Detection of mutations in the uromodulin gene in five Japanese families. *Kidney Int.* **65**, 1589–1597 (2004).
73. Spain, H., Plumb, T. & Mikuls, T. R. Gout as a manifestation of familial juvenile hyperuricemic nephropathy. *J. Clin. Rheumatol.* **20**, 442–444 (2014).
74. Lhotta, K. *et al.* Familial juvenile hyperuricemic nephropathy: report on a new mutation and a pregnancy. *Clin. Nephrol.* **71**, 80–83 (2009).
75. Schaeffer, C. *et al.* Urinary secretion and extracellular aggregation of mutant uromodulin isoforms. *Kidney Int.* **81**, 769–778 (2012).
76. Hart, T. C. *et al.* Mutations of the *UMOD* gene are responsible for medullary cystic kidney disease 2 and familial juvenile hyperuricaemic nephropathy. *J. Med. Genet.* **39**, 882–892 (2002).
77. Bleyer, A. J., Trachtman, H., Sandhu, J., Gorry, M. C. & Hart, T. C. Renal manifestations of a mutation in the uromodulin (Tamm Horsfall protein) gene. *Am. J. Kidney Dis.* **42**, E20–E26 (2003).

78. Wolf, M. T. F. *et al.* Mutations of the *Uromodulin* gene in MCKD type 2 patients cluster in exon 4, which encodes three EGF-like domains. *Kidney Int.* **64**, 1580–1587 (2003).
79. Vylet'al, P. *et al.* Alterations of uromodulin biology: a common denominator of the genetically heterogeneous FJHN/MCKD syndrome. *Kidney Int.* **70**, 1155–1169 (2006).
80. Zaucke, F. *et al.* Uromodulin is expressed in renal primary cilia and *UMOD* mutations result in decreased ciliary uromodulin expression. *Hum. Mol. Genet.* **19**, 1985–1997 (2010).
81. Liu, M. *et al.* Novel *UMOD* mutations in familial juvenile hyperuricemic nephropathy lead to abnormal uromodulin intracellular trafficking. *Gene* **531**, 363–369 (2013).
82. Bernascone, I. *et al.* Defective intracellular trafficking of uromodulin mutant isoforms. *Traffic* **7**, 1567–1579 (2006).
83. Raffler, G., Zitt, E., Sprenger-Mähr, H., Nagel, M. & Lhotta, K. Autosomal dominant tubulointerstitial kidney disease caused by uromodulin mutations: seek and you will find. *Wien. Klin. Wochenschr.* **128**, 291–294 (2016).
84. Turner, J. J. O. *et al.* UROMODULIN mutations cause familial juvenile hyperuricemic nephropathy. *J. Clin. Endocrinol. Metab.* **88**, 1398–1401 (2003).
85. Takemasa, Y. *et al.* Familial juvenile hyperuricemia in early childhood in a boy with a novel gene mutation. *CEN Case Rep* **10**, 426–430 (2021).
86. Christiansen, R. E. *et al.* A mother and daughter with unexplained renal failure. *Nephron Clin. Pract.* **119**, c1–c9 (2011).
87. Nasr, S. H., Lucia, J. P., Galgano, S. J., Markowitz, G. S. & D'Agati, V. D. Uromodulin storage disease. *Kidney Int.* **73**, 971–976 (2008).
88. Gong, K. *et al.* Autosomal dominant tubulointerstitial kidney disease genotype and phenotype correlation in a Chinese cohort. *Sci. Rep.* **11**, 3615 (2021).
