# Supplementary material for: Structure of the decoy module of human glycoprotein 2 and uromodulin and its interaction with bacterial adhesin FimH
Source: PubMed Central journal article supplement (PMC8930769; doi:10.1038/s41594-022-00729-3), 2022-03-10

**Extended Data Fig. 9**

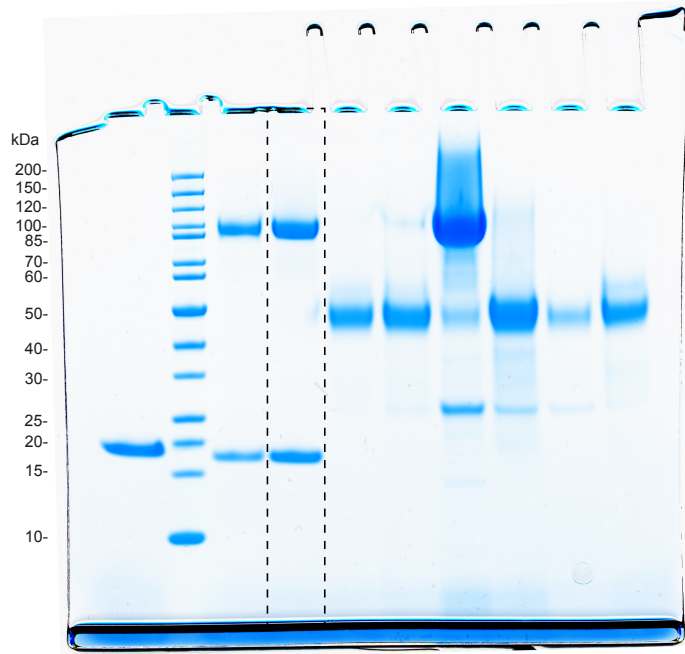

Supplement: 41594_2022_729_MOESM8_ESM.pdf [file 41594_2022_729_MOESM8_ESM.pdf]
